# Supplementary material for: Composite calcite and opal test in Foraminifera (Rhizaria)
Source: Copernicus journal article supplement (doi:10.5194/egusphere-2024-60), 2024-01-16
Supplement: Supplementary file 1 [file egusphere-2024-60-supplement.pdf]

# Composite calcite and opal test in Foraminifera (Rhizaria)

Julien Richirt<sup>1\*</sup>, Satoshi Okada<sup>1</sup>, Yoshiyuki Ishitani<sup>1</sup>, Katsuyuki Uematsu<sup>2</sup>, Akihiro Tame<sup>2</sup>, Kaya Oda<sup>1</sup>, Noriyuki Isobe<sup>3</sup>, Toyoho Ishimura<sup>4</sup>, Masashi Tsuchiya<sup>5</sup>, Hidetaka Nomaki<sup>1</sup>

<sup>1</sup> SUGAR, X-star, Japan Agency for Marine-Earth Science and Technology (JAMSTEC), 2-15 Natsushima-cho, Yokosuka 237-0061, Japan

<sup>2</sup> Marine Works Japan Ltd., 3-54-1 Oppamahigashi-cho, Yokosuka, Kanagawa, 237-0063, Japan

<sup>3</sup> Research Institute for Marine Resources Utilization (MRU), Japan Agency for Marine-Earth Science and Technology (JAMSTEC), Yokosuka, Kanagawa, 237-0061, Japan

<sup>4</sup> Graduate School of Human and Environmental Studies, Kyoto University, Yoshidanihonmatsu, Sakyo-ku, Kyoto 606-8501, Japan

<sup>5</sup> Research Institute for Global Change (RIGC), Japan Agency for Marine-Earth Science and Technology (JAMSTEC), Yokosuka, Kanagawa, 237-0061, Japan

*Correspondence to:* Julien Richirt (richirt.julien@gmail.com)

## Supplementary material

## Supplementary Method 1

Conventional quantitative EDS analyses uses ZAF method for correction by atomic number (Z), absorption (A) and X-ray fluorescence (F), assuming that the surface is completely flat and elemental composition along with depth direction is homogeneous. However, our cryo-SEM-EDS maps does not meet these requirements, and the apparent EDS maps are correlated with background, as indicated by the similarity between count-per-second (CPS) maps and the EDS maps of low-intensity elements. Several factors cause the inhomogeneous CPS, such as position-dependent electro penetration depth and electron scatter within the specimen. Therefore, the aim of this correction procedure is to minimise the position-dependent background signal.

EDS maps are generated from the number of counts where X-rays from atom A appears, and the counts  $I_A$  is composed of pure signal  $S_A$  and background  $B_A$ , mostly composed of bremsstrahlung effect. Because of  $B_A$ , EDS maps show random noise-like background, whose intensity is correlated with the CPS. CPS represent the sum of signals of all the atoms and the background:

$$\text{CPS} = \sum_i S_i + B = \sum_i I_i + B_{\bar{i}}$$

With  $i$  the atom of interest,  $B$  the summation of the background intensity at all the energy, and  $B_{\bar{i}}$  the summation of the background intensity at energy ranges where characteristic X-ray peaks are absent. The background mostly comes from bremsstrahlung effect, thus is dependent on beam condition. Here, we assume that the background shape is the same in any position of EDS maps. The intensity-to-noise ratio  $R$  of an atom  $i$  at position  $(m, n)$  is then defined as:

$$R(m, n) = \frac{I_i(m, n)}{B_i(m, n)} = \frac{S_i(m, n)}{B_i(m, n)} + 1 = \frac{I_i(m, n)}{\text{CPS} - \sum_i I_i(m, n)}$$

which is related to the conventional signal-to-noise ratio  $S_i/B_i$ . We used  $R$  to map elements.

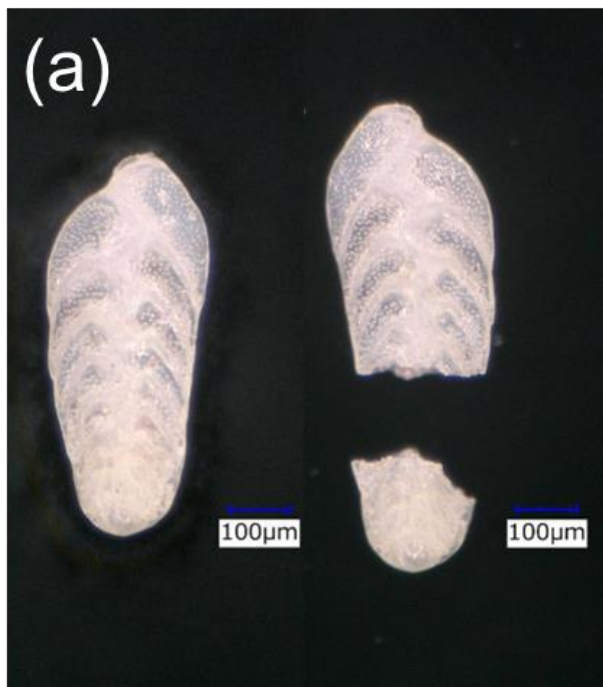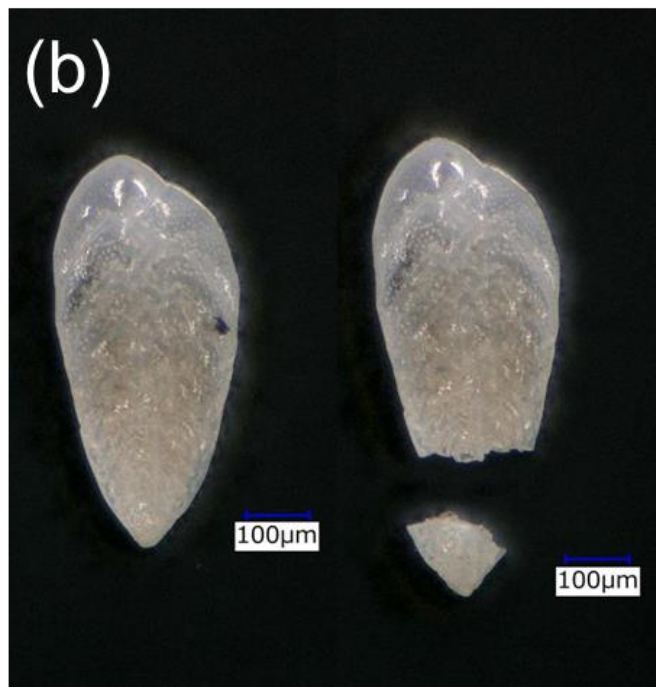

45 **Supplementary Fig. 1:** Stereomicroscope image of the macrospheric (a) and microspheric (b) *Bolivina spissa* from NSB station before and after dissection prior isotopic composition measurement.

50

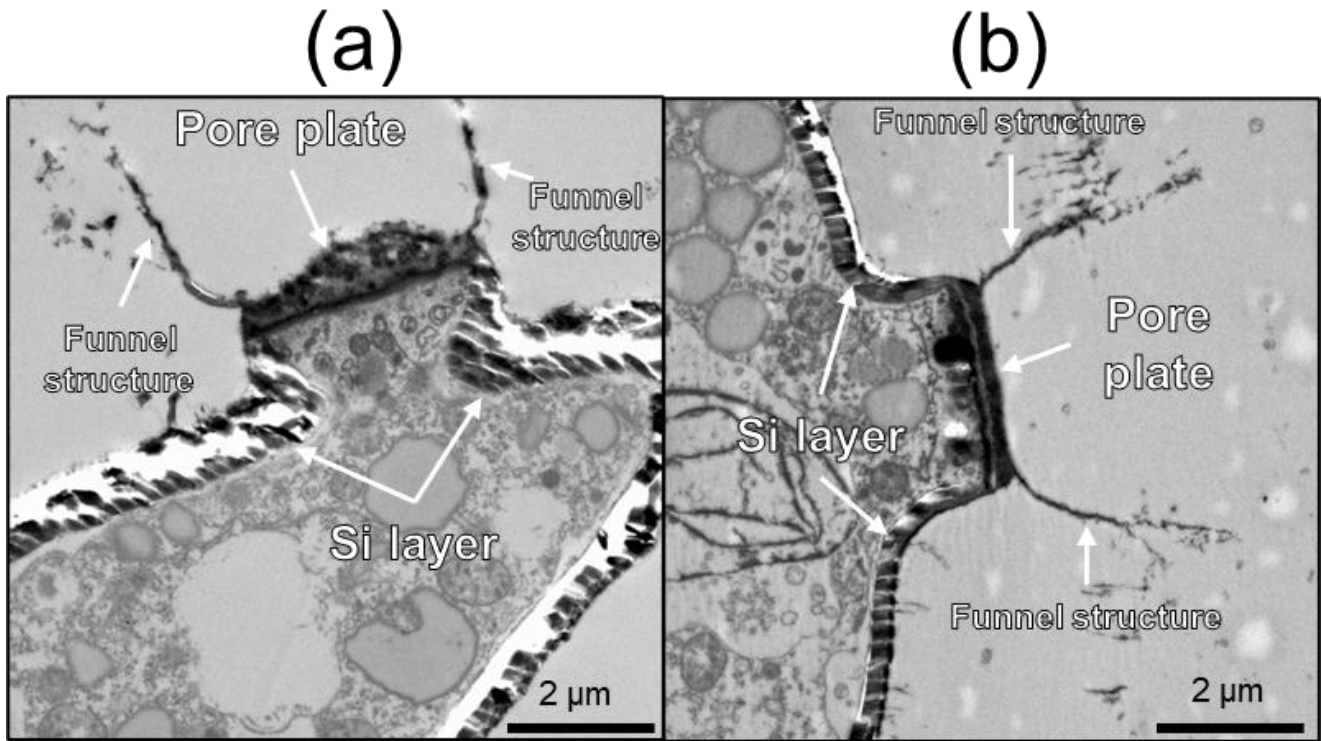

Supplementary Fig. 2: (a and b) two ultrathin sections of *B. spissa* imaged with TEM showing pore area, with the pore plate and the Si layer. The “funnel” structures, coating the inner surface of the original pore’s calcitic wall before decalcification, are also visible.

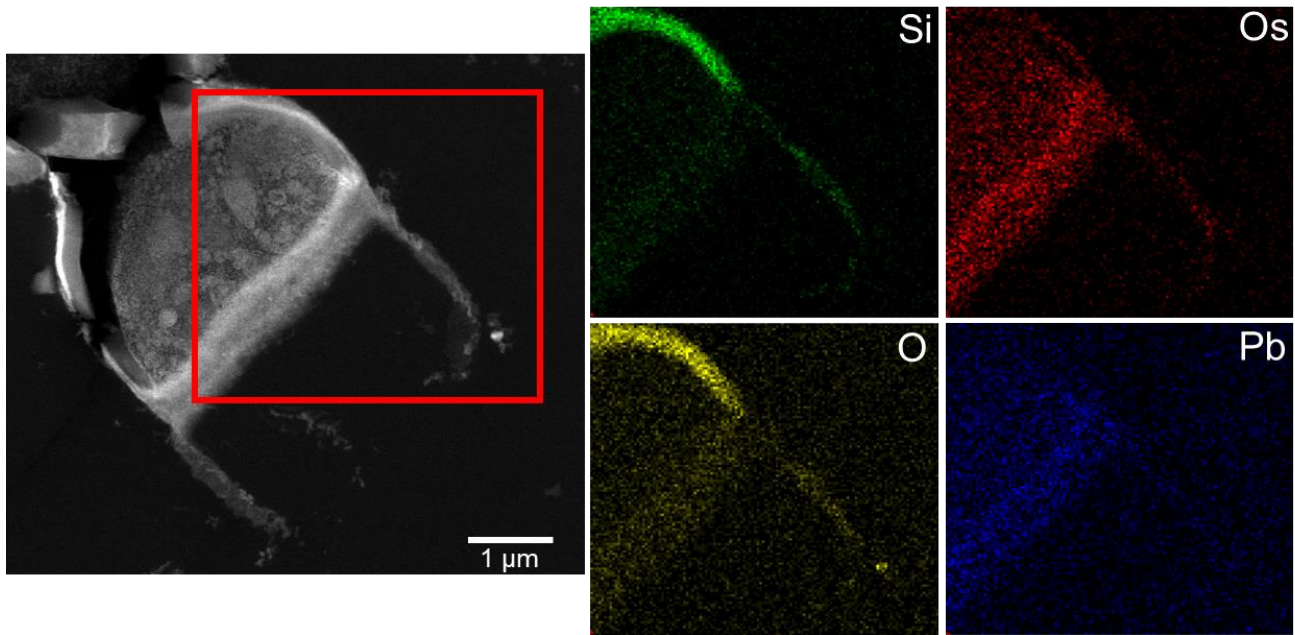

Supplementary Fig. 3: STEM-EDS image from a pore region of *B. spissa* after decalcification. EDS maps of the region framed by the red rectangle for elements Si, O, Os and Pb. Si and O are the main component of the Si layer coating the inside part of the pore. Os and Pb distribution are indicating organic matter, such as the pore plate. Note that funnel-structures and the pore plate are not Si enriched.

(a)

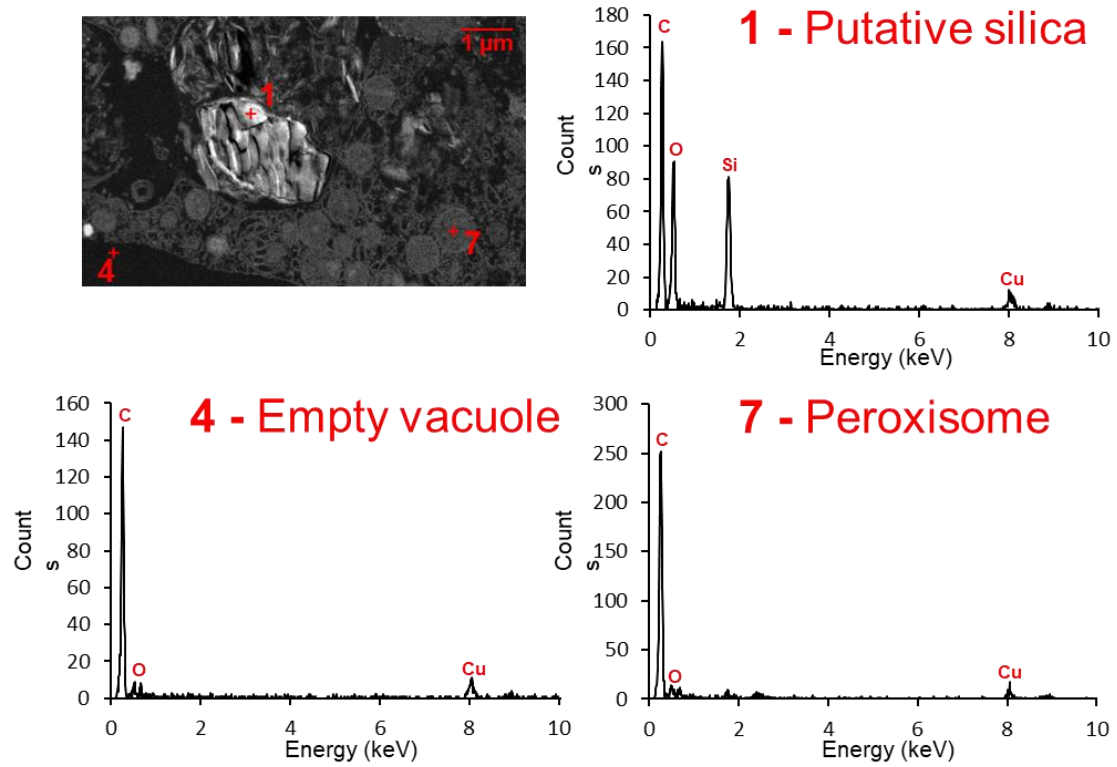

Supplementary Fig. 4: point measurement EDS performed on ultrathin sections of *B. spissa* imaged with STEM. (a) spectra from putative SDV content (1), an empty vacuole (4) and a peroxisome (7). (b) spectra from putative SDV content (1 and 4) and the Si layer coating the inside part of the calcitic shell (5). (c) Spectra from the content in sediment vesicle filled with sediment particles (2 and 3) and organic matter (6). Cu signal is from the TEM support grid.

(b)

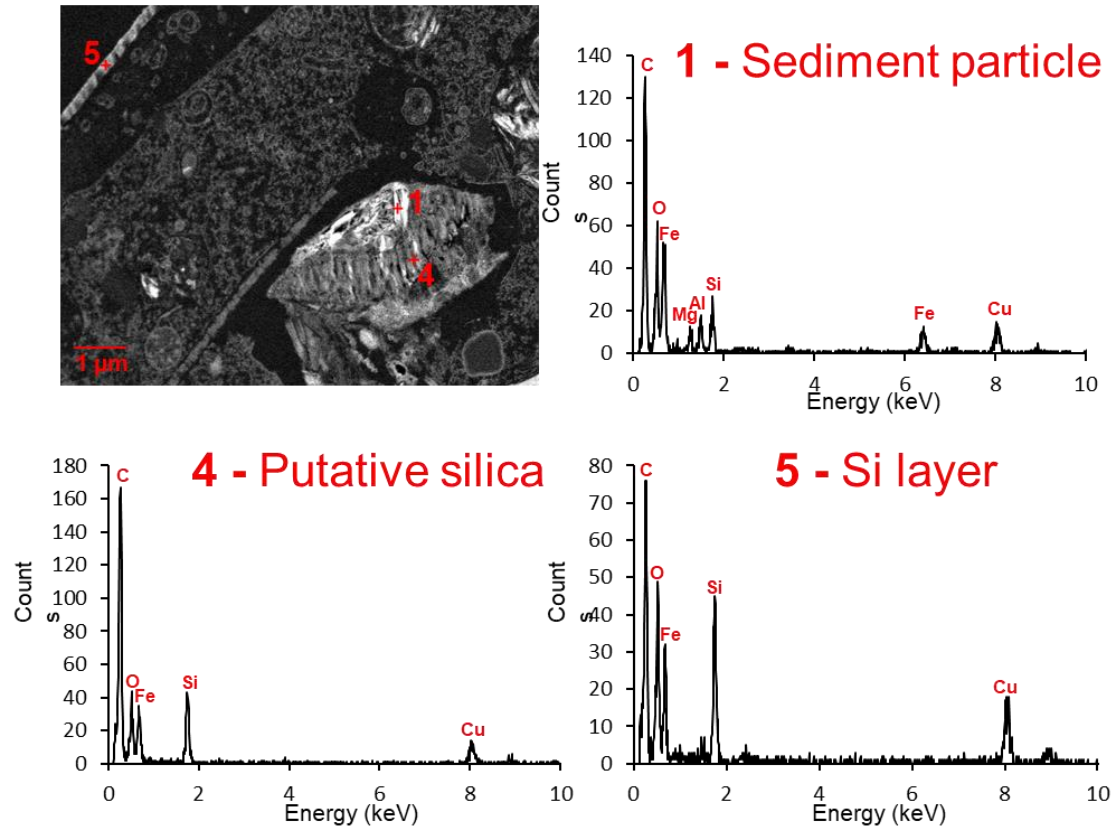

95 Supplementary Fig. 4: continued

(c)

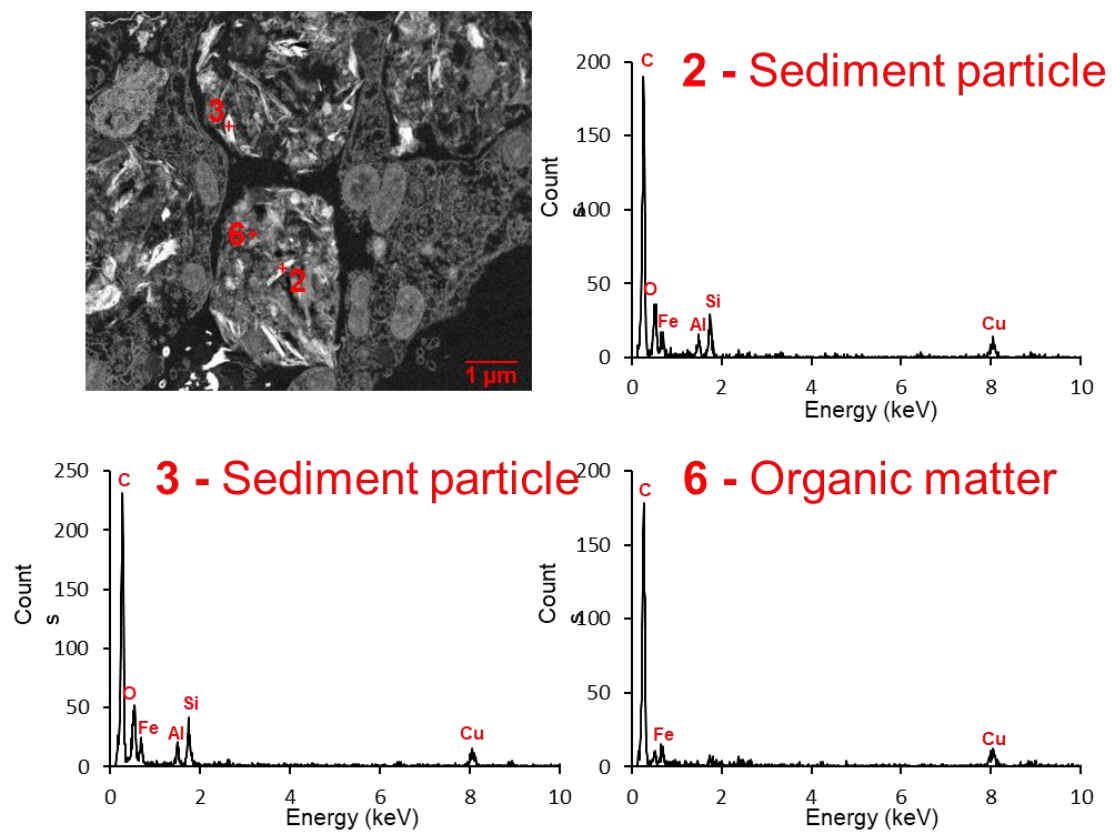

Supplementary Fig. 4: continued

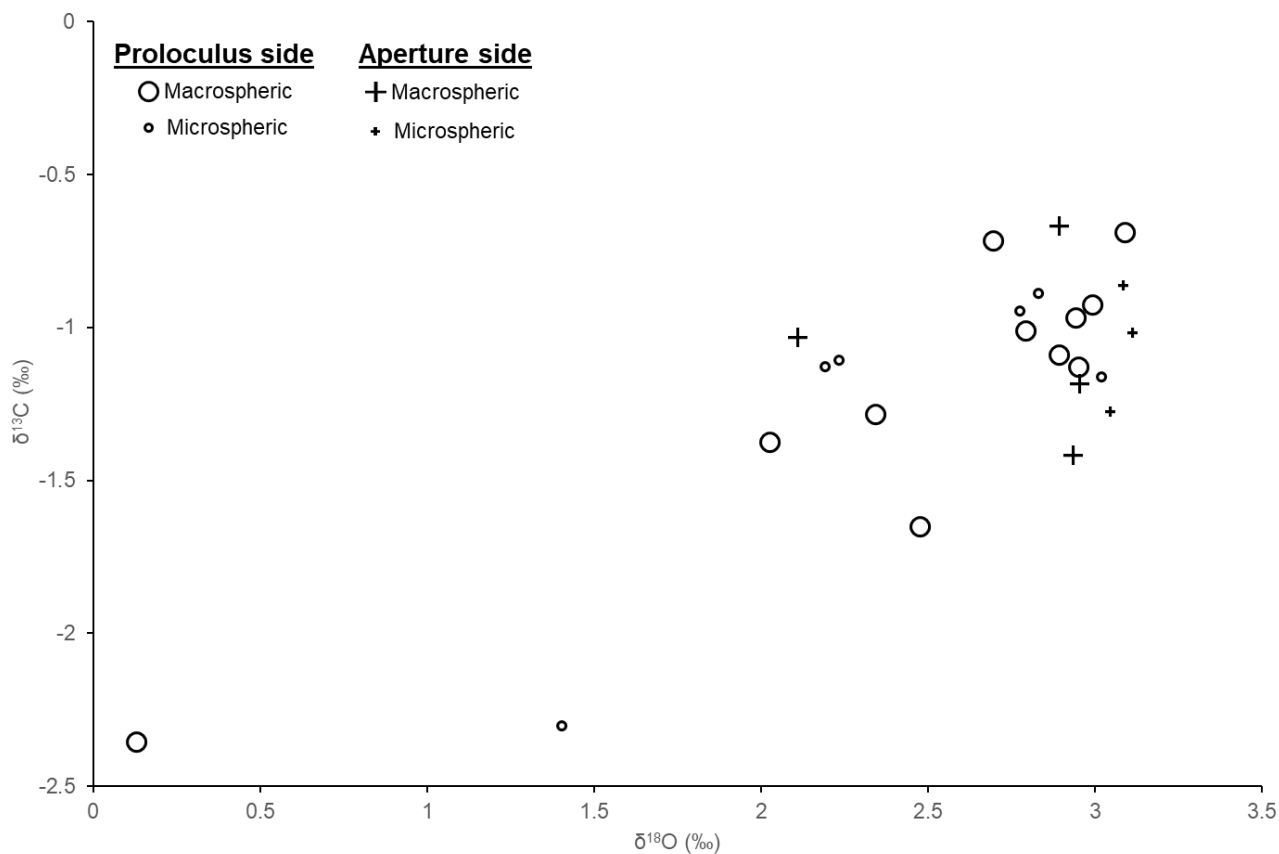

Supplementary Fig. 5: Stable carbon ( $\delta^{13}\text{C}$ ) and oxygen ( $\delta^{18}\text{O}$ ) isotopic compositions of calcite measured after microdissection of individuals to separate the oldest chambers on the proloculus side (circles) and on the aperture side (crosses). The size of symbols indicates if the individuals was macroscopic (large symbol) or microspheric (small symbol).

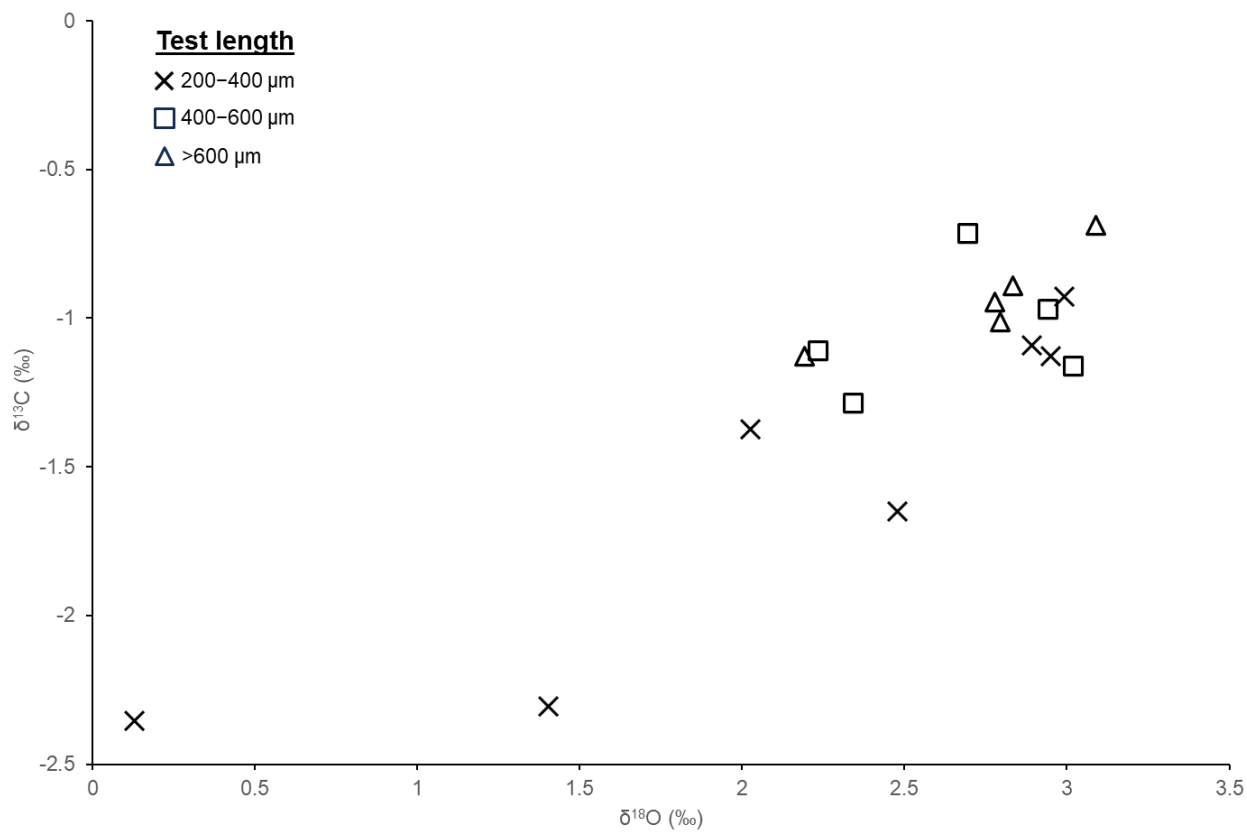

**Supplementary Fig. 6: Stable carbon ( $\delta^{13}\text{C}$ ) and oxygen ( $\delta^{18}\text{O}$ ) isotopic compositions of calcite measured on the proloculus side and total length of individual tests measured. Crosses=200–400 μm, squares=400–600 μm and triangles= >600 μm.**

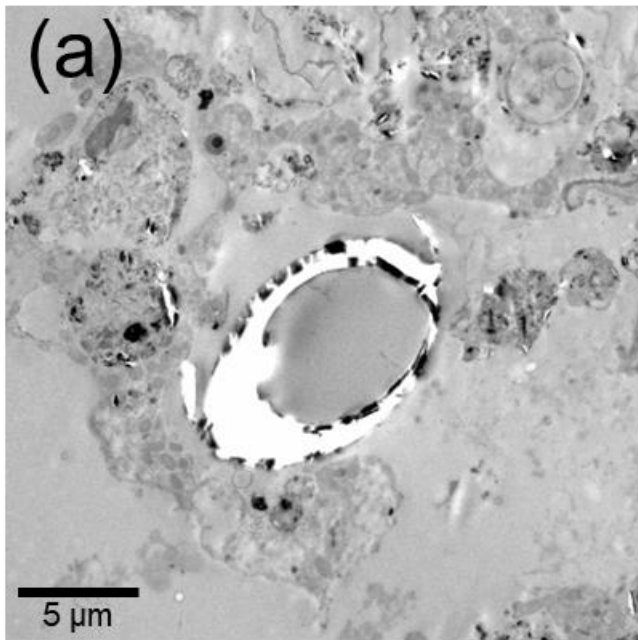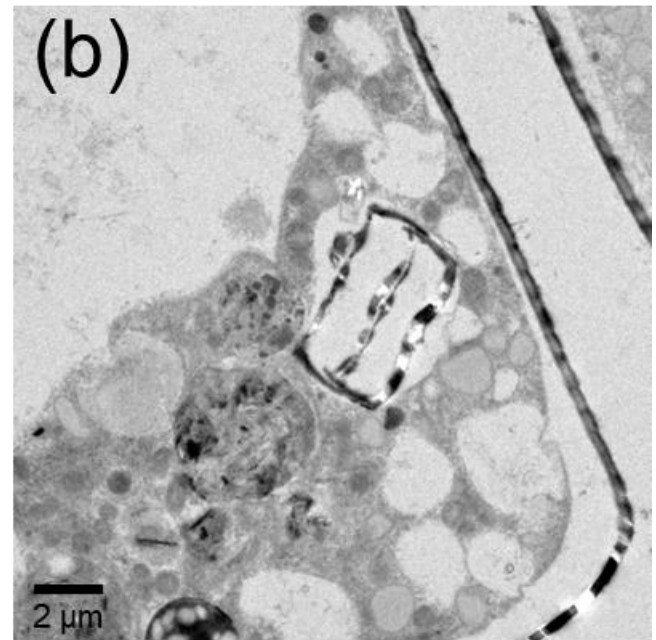

**Supplementary Fig. 7: (a and b) Examples of TEM images of the cellular content of *Bolivina spissa* from NSB station showing empty diatom frustule remains.**

115

120

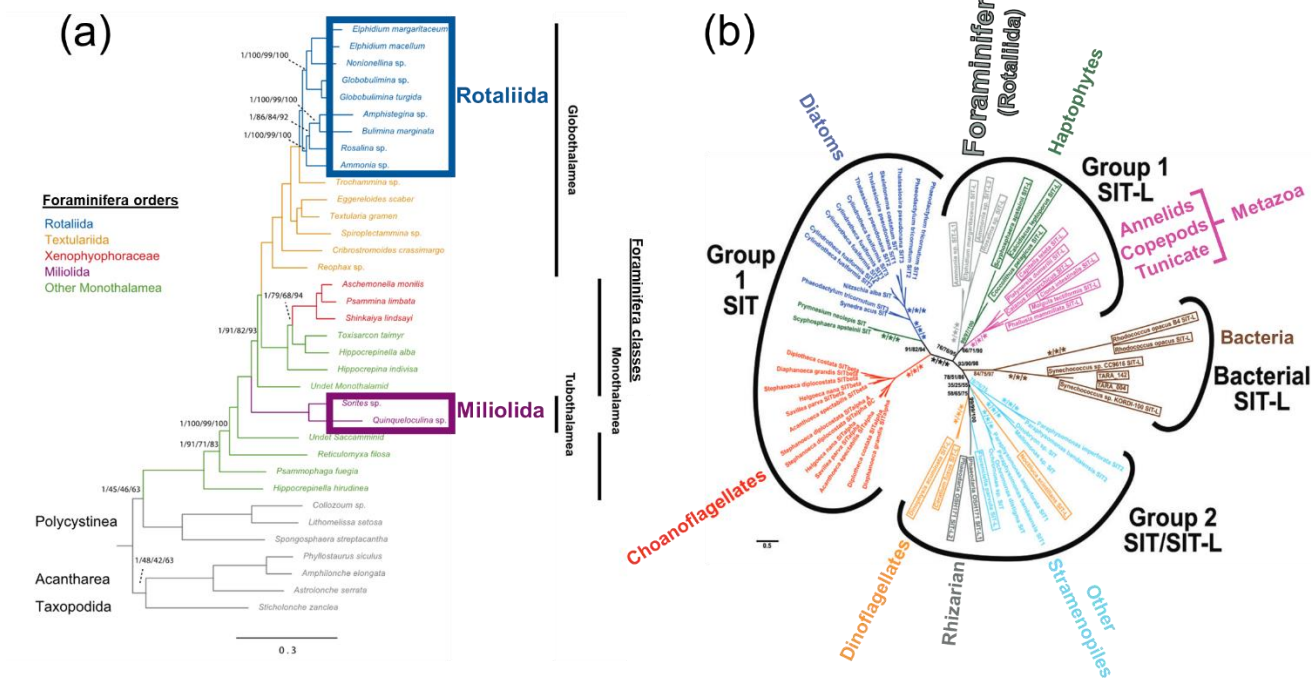

Supplementary Fig. 8: (a) Phylogenetic tree corresponding to the best ML tree and Bayesian inference from a concatenated analysis of 199 proteins showing all major groups of Foraminifera with Rotaliida in blue and Miliolida in purple (modified from Sierra et al., 2022). (b) Phylogenetic tree based on Si transporter sequences (modified from Marron et al., 2016). Foraminifera (grey), all belonging to the order Rotaliida such as Bolivina, are branching with Haptophyta and different Metazoa.

125

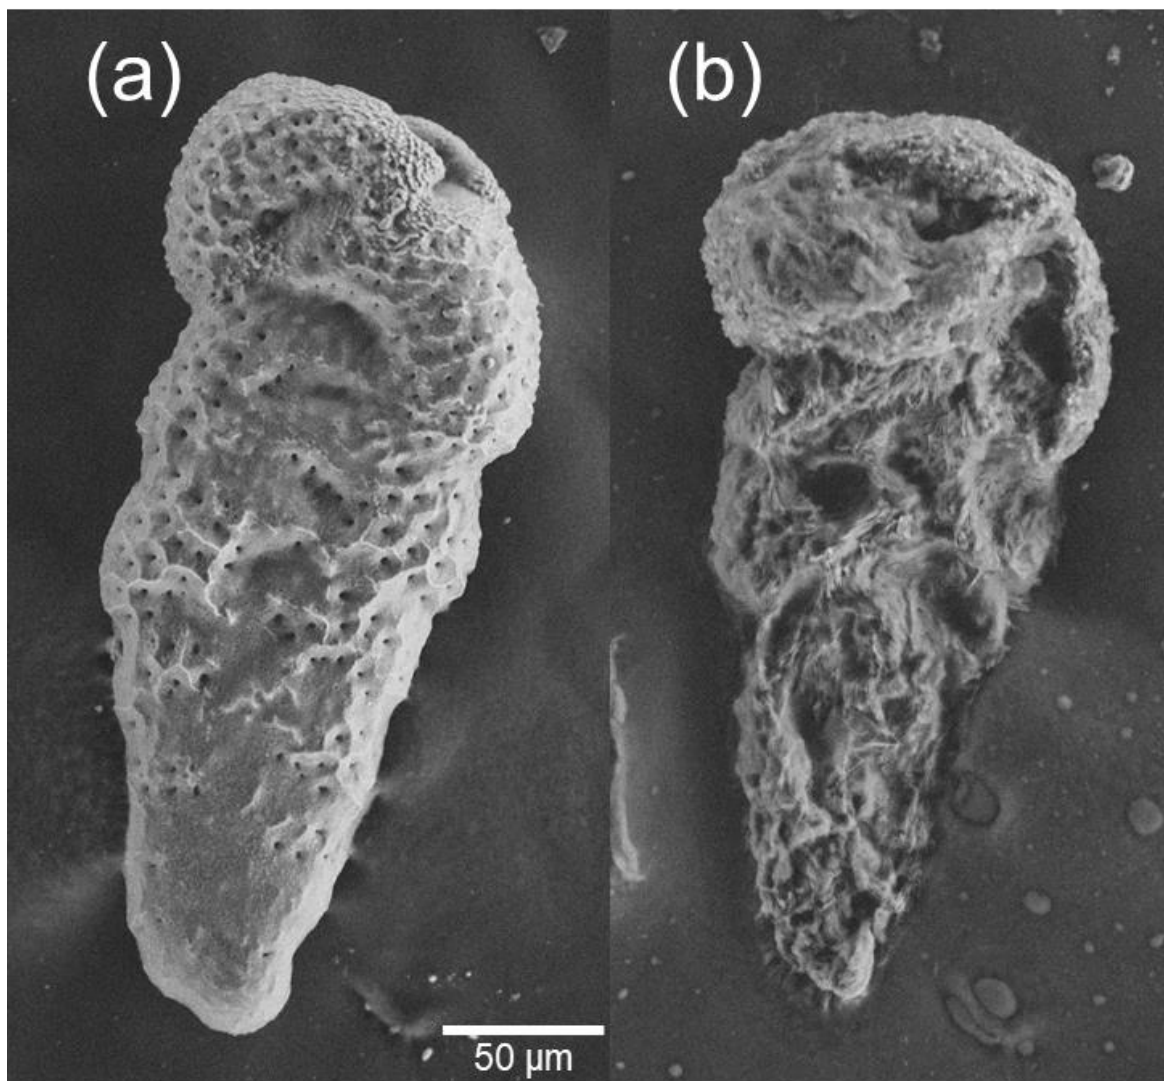

**Supplementary Fig. 9:** SEM images of *Bolivina variabilis* before (a) and after (b) decalcification using EDTA. Specimen from a strain cultured at the Japan Agency for Marine Earth Science and Technology (JAMSTEC) in Japan .

130

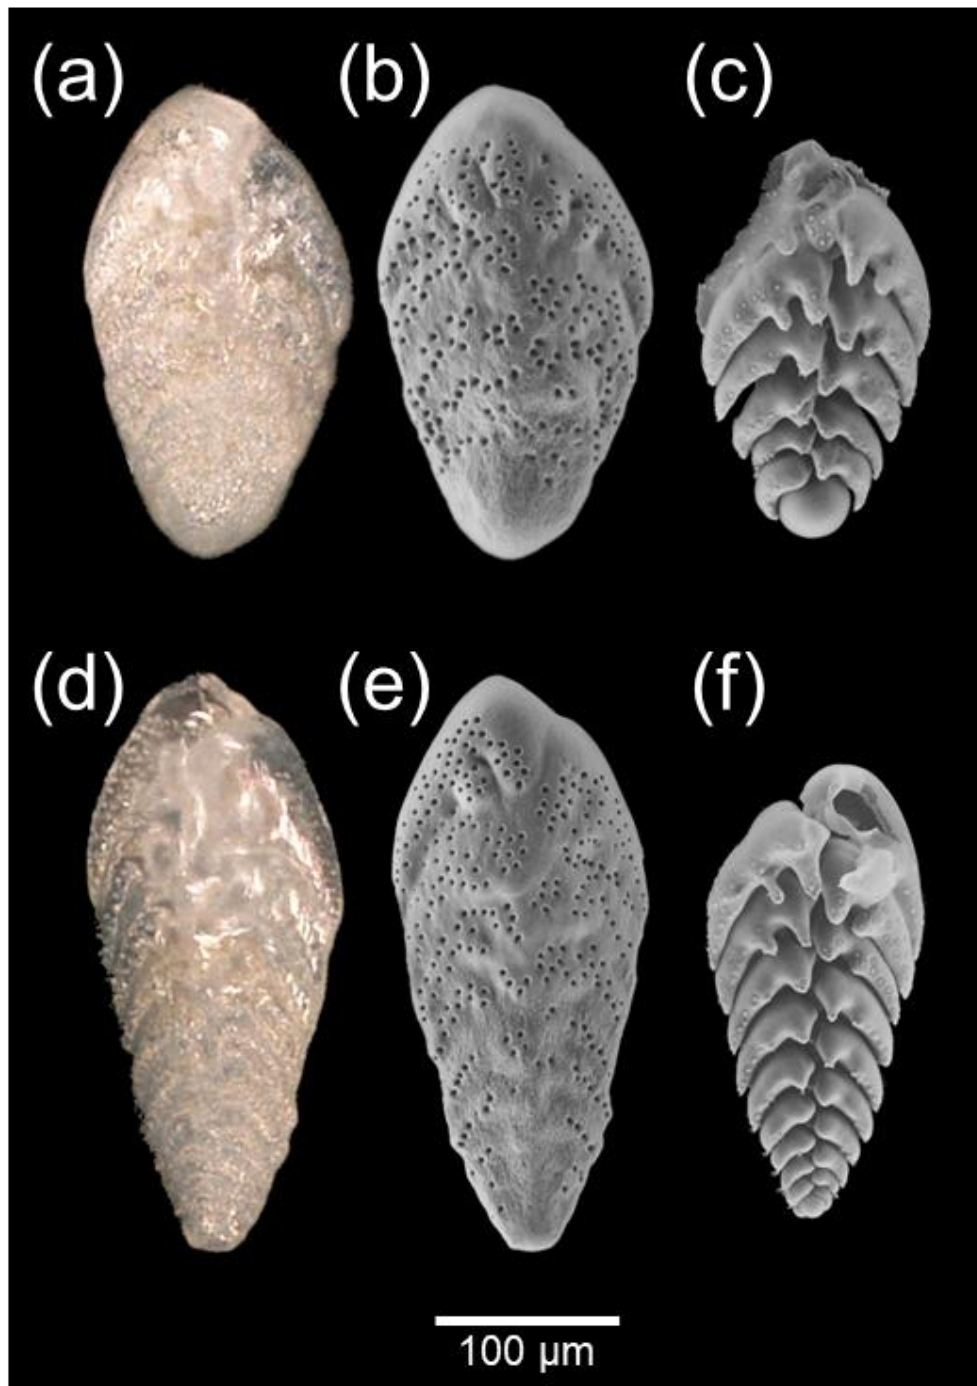

Supplementary Fig. 10: *Bolivina* sp. sampled from Off Misaki site (Sagami Bay, 740 m depth). Macrospheric (a–c) and microspheric (d–f) specimen, imaged with stereomicroscope (a and d) and low-vacuum SEM before (b and e) and after (d and f) decalcification with EDTA to expose the underlying structure below the calcitic shell. Main differences with *B. spissa* are the absence of costae on the proloculus side (before decalcification) and the presence of “horn-like” structures pointing toward the proloculus (after decalcification).

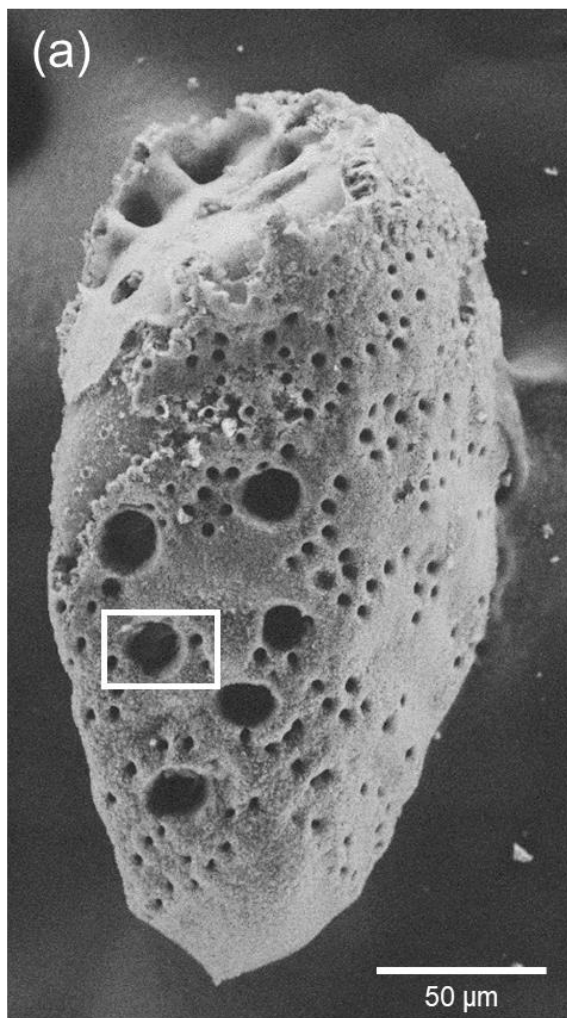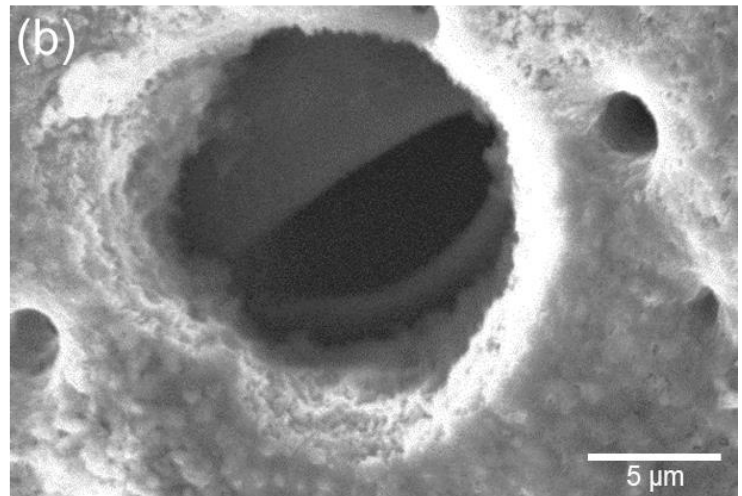

Supplementary Fig. 11: (a) Drilling marks on a dead specimen of *Bolivina* sp. from Off Misaki site (Sagami Bay, 740 m depth). Note that the underlying structure is not fully bored compared to the calcitic part of the test (b).

150 **Supplementary Table 1: Si layer thickness in  $\mu\text{m}$ , average and standard deviation (sd) regarding chamber number, numbered from the proloculus. The total number of visible chambers (excluding proloculus) is indicated between brackets below the individual ID. N/A=not available.**

| Chamber    | Ind. 1<br>(14 chambers) | Ind. 2<br>(14 chambers) | Ind. 3<br>(13 chambers) | Ind. 4<br>(12 chambers) | Ind. 5<br>(15 chambers) | Ind. 6<br>(13 chambers) | Ind. 7<br>(12 chambers) | Average | sd   |
|------------|-------------------------|-------------------------|-------------------------|-------------------------|-------------------------|-------------------------|-------------------------|---------|------|
| Proloculus | 1.60                    | 1.10                    | 1.65                    | 1.45                    | 1.45                    | N/A                     | 1.20                    | 1.41    | 0.22 |
| 1          | 1.05                    | 0.65                    | 0.70                    | 0.50                    | 0.55                    | 0.80                    | 0.45                    | 0.67    | 0.21 |
| 2          | 0.60                    | 0.45                    | 0.50                    | 0.40                    | 0.45                    | 0.40                    | 0.35                    | 0.45    | 0.08 |
| 3          | 0.50                    | N/A                     | 0.35                    | 0.35                    | 0.25                    | 0.25                    | 0.32                    | 0.34    | 0.09 |
| 4          | 0.45                    | 0.30                    | 0.25                    | 0.27                    | 0.25                    | 0.15                    | 0.30                    | 0.28    | 0.09 |
| 5          | 0.35                    | N/A                     | 0.20                    | N/A                     | 0.20                    | 0.15                    | 0.18                    | 0.22    | 0.08 |
| 6          | 0.30                    | 0.30                    | 0.15                    | 0.25                    | 0.20                    | 0.15                    | 0.15                    | 0.21    | 0.07 |
| 7          | 0.23                    | N/A                     | 0.15                    | N/A                     | 0.20                    | 0.15                    | 0.15                    | 0.18    | 0.04 |
| 8          | 0.20                    | 0.25                    | 0.15                    | 0.15                    | 0.15                    | N/A                     | 0.10                    | 0.17    | 0.05 |
| 9          | 0.20                    | N/A                     | 0.13                    | N/A                     | 0.12                    | N/A                     | 0.10                    | 0.14    | 0.04 |
| 10         | 0.15                    | 0.18                    | 0.10                    | N/A                     | 0.15                    | 0.10                    | 0.08                    | 0.13    | 0.04 |
| 11         | 0.05                    | N/A                     | 0.08                    | N/A                     | 0.10                    | 0.08                    | N/A                     | 0.08    | 0.02 |
| 12         | N/A                     | N/A                     | 0.05                    | N/A                     | 0.10                    | N/A                     | N/A                     | 0.08    | 0.04 |

155

160

| Individual ID | Microspheric<br>or<br>Macrospheric | Proloculus side<br>length (µm) | total length (µm) | CaCO <sub>3</sub> weight<br>proloculus side (ug) | Proloculus side<br>δ <sup>13</sup> C (‰) | Proloculus side<br>δ <sup>18</sup> O (‰) | CaCO <sub>3</sub> weight<br>aperture side (ug) | Apertural side<br>δ <sup>13</sup> C (‰) | Apertural side<br>δ <sup>18</sup> O (‰) |
|---------------|------------------------------------|--------------------------------|-------------------|--------------------------------------------------|------------------------------------------|------------------------------------------|------------------------------------------------|-----------------------------------------|-----------------------------------------|
| micro03       | microspheric                       | 110                            | 620               | 0.9                                              | -0.95                                    | 2.78                                     | NA                                             | NA                                      | NA                                      |
| micro05       | microspheric                       | 140                            | 620               | 1.1                                              | -1.13                                    | 2.19                                     | NA                                             | NA                                      | NA                                      |
| micro06       | microspheric                       | 120                            | 480               | 0.8                                              | -1.16                                    | 3.02                                     | 5.5                                            | -1.27                                   | 3.05                                    |
| micro08       | microspheric                       | 100                            | 500               | 0.6                                              | -1.11                                    | 2.23                                     | NA                                             | NA                                      | NA                                      |
| micro10       | microspheric                       | 100                            | 730               | 0.8                                              | -0.89                                    | 2.83                                     | 13.6                                           | -0.86                                   | 3.08                                    |
| micro14       | microspheric                       | 50                             | 240               | 0.2                                              | -2.31                                    | 1.40                                     | 1.1                                            | -1.02                                   | 3.11                                    |
| macro01       | macrospheric                       | 80                             | 560               | 3.8                                              | -1.29                                    | 2.34                                     | NA                                             | NA                                      | NA                                      |
| macro03       | macrospheric                       | 190                            | 640               | 2.3                                              | -0.69                                    | 3.09                                     | NA                                             | NA                                      | NA                                      |
| macro05       | macrospheric                       | 120                            | 570               | 1.5                                              | -0.97                                    | 2.94                                     | 7.3                                            | -1.03                                   | 2.11                                    |
| macro06       | macrospheric                       | 200                            | 570               | 2.9                                              | -0.72                                    | 2.70                                     | NA                                             | NA                                      | NA                                      |
| macro09       | macrospheric                       | 130                            | 330               | 1.2                                              | -1.09                                    | 2.89                                     | NA                                             | NA                                      | NA                                      |
| macro10       | macrospheric                       | 160                            | 650               | 1.7                                              | -1.01                                    | 2.79                                     | NA                                             | NA                                      | NA                                      |
| macro11       | macrospheric                       | 100                            | 290               | 0.8                                              | -0.93                                    | 2.99                                     | 1.8                                            | -1.18                                   | 2.95                                    |
| macro14       | macrospheric                       | 100                            | 290               | 0.8                                              | -1.13                                    | 2.95                                     | NA                                             | NA                                      | NA                                      |
| macro17       | macrospheric                       | 100                            | 310               | 0.8                                              | -1.38                                    | 2.03                                     | 2.3                                            | -1.42                                   | 2.93                                    |
| macro18       | macrospheric                       | 60                             | 260               | 0.5                                              | -1.65                                    | 2.48                                     | NA                                             | NA                                      | NA                                      |
| macro19       | macrospheric                       | 100                            | 220               | 0.9                                              | -2.36                                    | 0.13                                     | 1.1                                            | -0.67                                   | 2.89                                    |
